# Supplementary material
Source: MDPI journal article supplement (https://www.mdpi.com/2304-6740/6/4/115)

# checkCIF/PLATON report

Structure factors have been supplied for datablock(s) User-defined

THIS REPORT IS FOR GUIDANCE ONLY. IF USED AS PART OF A REVIEW PROCEDURE FOR PUBLICATION, IT SHOULD NOT REPLACE THE EXPERTISE OF AN EXPERIENCED CRYSTALLOGRAPHIC REFEREE.

No syntax errors found.      CIF dictionary      Interpreting this report

## Datablock: User-defined

---

Bond precision:    C-C = 0.0088 Å

Wavelength=0.71075

Cell:                a=7.0728(9)                b=10.3625(13)                c=12.0604(16)  
                      alpha=67.284(4)                beta=81.212(4)                gamma=77.056(4)  
Temperature:        106 K

|                | Calculated                                    | Reported            |
|----------------|-----------------------------------------------|---------------------|
| Volume         | 792.48(18)                                    | 792.48(18)          |
| Space group    | P -1                                          | P -1                |
| Hall group     | -P 1                                          | -P 1                |
| Moiety formula | C16 H4 Co N10 O4, C4 H12<br>Co N2 O4, 6(H2 O) | C20 H28 Co2 N12 O14 |
| Sum formula    | C20 H28 Co2 N12 O14                           | C20 H28 Co2 N12 O14 |
| Mr             | 778.40                                        | 778.38              |
| Dx,g cm-3      | 1.631                                         | 1.631               |
| Z              | 1                                             | 1                   |
| Mu (mm-1)      | 1.130                                         | 1.131               |
| F000           | 398.0                                         | 398.0               |
| F000'          | 398.88                                        |                     |
| h,k,lmax       | 9,13,15                                       | 9,13,15             |
| Nref           | 3640                                          | 3640                |
| Tmin,Tmax      | 0.873,0.978                                   | 0.873,0.978         |
| Tmin'          | 0.636                                         |                     |

Correction method= # Reported T Limits: Tmin=0.873 Tmax=0.978

AbsCorr = MULTI-SCAN

Data completeness= 1.000

Theta(max)= 27.491

R(reflections)= 0.0977( 2163)

wR2(reflections)= 0.2105( 3698)

S = 1.109

Npar= 235

---

The following ALERTS were generated. Each ALERT has the format

**test-name\_ALERT\_alert-type\_alert-level.**

Click on the hyperlinks for more details of the test.

### Alert level A

|                   |                      |    |         |   |             |
|-------------------|----------------------|----|---------|---|-------------|
| PLAT417_ALERT_2_A | Short Inter D-H..H-D | H6 | ..H14   | . | 1.69 Ang.   |
|                   |                      |    | x,y,z = |   | 1_555 Check |

### Alert level B

|                   |                            |                    |         |    |              |
|-------------------|----------------------------|--------------------|---------|----|--------------|
| PLAT245_ALERT_2_B | U(iso) H12                 | Smaller than U(eq) | O6      | by | 0.062 Ang**2 |
| PLAT417_ALERT_2_B | Short Inter D-H..H-D       | H11                | ..H14   | .  | 2.09 Ang.    |
|                   |                            |                    | x,y,z = |    | 1_555 Check  |
| PLAT420_ALERT_2_B | D-H Without Acceptor       | O7                 | --H13   | .  | Please Check |
| PLAT482_ALERT_4_B | Small D-H..A Angle Rep for | O8                 | ..O5    | .  | 86.60 Degree |

### Alert level C

|                   |                            |              |              |       |                |
|-------------------|----------------------------|--------------|--------------|-------|----------------|
| PLAT341_ALERT_3_C | Low Bond Precision on      | C-C Bonds    | .....        |       | 0.00883 Ang.   |
| PLAT417_ALERT_2_C | Short Inter D-H..H-D       | H2           | ..H11        | .     | 2.10 Ang.      |
|                   |                            |              | 1-x,-y,1-z = |       | 2_656 Check    |
| PLAT417_ALERT_2_C | Short Inter D-H..H-D       | H2           | ..H12        | .     | 2.10 Ang.      |
|                   |                            |              | 1-x,-y,1-z = |       | 2_656 Check    |
| PLAT417_ALERT_2_C | Short Inter D-H..H-D       | H4           | ..H5         | .     | 2.13 Ang.      |
|                   |                            |              | x,y,z =      |       | 1_555 Check    |
| PLAT482_ALERT_4_C | Small D-H..A Angle Rep for | O7           | ..O6         | .     | 98.80 Degree   |
| PLAT482_ALERT_4_C | Small D-H..A Angle Rep for | O7           | ..O5         | .     | 90.00 Degree   |
| PLAT482_ALERT_4_C | Small D-H..A Angle Rep for | O8           | ..O5         | .     | 98.00 Degree   |
| PLAT755_ALERT_4_C | D-H Calc                   | 0.94000, Rep | 0.943(4)     | ..... | Senseless s.u. |
|                   | O3 -H1                     | 1.555        | 1.555        | ..... | # 46 Check     |
| PLAT755_ALERT_4_C | D-H Calc                   | 0.94000, Rep | 0.936(5)     | ..... | Senseless s.u. |
|                   | O3 -H2                     | 1.555        | 1.555        | ..... | # 46 Check     |
| PLAT755_ALERT_4_C | D-H Calc                   | 0.95000, Rep | 0.953(5)     | ..... | Senseless s.u. |
|                   | O4 -H3                     | 1.555        | 1.555        | ..... | # 46 Check     |
| PLAT755_ALERT_4_C | D-H Calc                   | 0.94000, Rep | 0.943(5)     | ..... | Senseless s.u. |
|                   | O4 -H4                     | 1.555        | 1.555        | ..... | # 46 Check     |
| PLAT755_ALERT_4_C | D-H Calc                   | 0.97000, Rep | 0.966(5)     | ..... | Senseless s.u. |
|                   | O5 -H5                     | 1.555        | 1.555        | ..... | # 46 Check     |
| PLAT755_ALERT_4_C | D-H Calc                   | 0.98000, Rep | 0.985(8)     | ..... | Senseless s.u. |
|                   | O5 -H6                     | 1.555        | 1.555        | ..... | # 46 Check     |
| PLAT755_ALERT_4_C | D-H Calc                   | 0.98000, Rep | 0.985(8)     | ..... | Senseless s.u. |
|                   | O5 -H6                     | 1.555        | 1.555        | ..... | # 46 Check     |
| PLAT755_ALERT_4_C | D-H Calc                   | 0.97000, Rep | 0.970(11)    | ..... | Senseless s.u. |
|                   | O6 -H11                    | 1.555        | 1.555        | ..... | # 46 Check     |
| PLAT756_ALERT_4_C | H...A Calc                 | 1.74000, Rep | 1.735(3)     | ..... | Senseless s.u. |
|                   | H1 -O1                     | 1.555        | 1.555        | ..... | # 46 Check     |
| PLAT756_ALERT_4_C | H...A Calc                 | 1.73000, Rep | 1.728(8)     | ..... | Senseless s.u. |
|                   | H2 -O6                     | 1.555        | 2.656        | ..... | # 46 Check     |
| PLAT756_ALERT_4_C | H...A Calc                 | 1.88000, Rep | 1.880(5)     | ..... | Senseless s.u. |
|                   | H3 -N1                     | 1.555        | 1.555        | ..... | # 46 Check     |
| PLAT756_ALERT_4_C | H...A Calc                 | 1.75000, Rep | 1.751(8)     | ..... | Senseless s.u. |
|                   | H4 -O5                     | 1.555        | 1.555        | ..... | # 46 Check     |
| PLAT756_ALERT_4_C | H...A Calc                 | 1.99000, Rep | 1.993(4)     | ..... | Senseless s.u. |
|                   | H5 -N2                     | 1.555        | 2.665        | ..... | # 46 Check     |
| PLAT758_ALERT_4_C | D-H..A Calc                | 172.00, Rep  | 172.2(3)     | ..... | Senseless s.u. |
|                   | O3 -H1 -O1                 | 1.555        | 1.555        | 1.555 | # 76 Check     |
| PLAT758_ALERT_4_C | D-H..A Calc                | 159.00, Rep  | 158.5(3)     | ..... | Senseless s.u. |
|                   | O4 -H3 -N1                 | 1.555        | 1.555        | 1.555 | # 76 Check     |
| PLAT758_ALERT_4_C | D-H..A Calc                | 162.00, Rep  | 161.6(3)     | ..... | Senseless s.u. |
|                   | O4 -H4 -O5                 | 1.555        | 1.555        | 1.555 | # 76 Check     |

|                   |                                                  |        |       |
|-------------------|--------------------------------------------------|--------|-------|
| PLAT906_ALERT_3_C | Large K Value in the Analysis of Variance .....  | 15.512 | Check |
| PLAT906_ALERT_3_C | Large K Value in the Analysis of Variance .....  | 2.939  | Check |
| PLAT975_ALERT_2_C | Check Calcd Resid. Dens. 1.09A From O5           | 0.61   | eA-3  |
| PLAT976_ALERT_2_C | Check Calcd Resid. Dens. 1.05A From O5           | -0.51  | eA-3  |
| PLAT976_ALERT_2_C | Check Calcd Resid. Dens. 1.04A From O4           | -0.46  | eA-3  |
| PLAT977_ALERT_2_C | Check Negative Difference Density on H2          | -0.31  | eA-3  |
| PLAT978_ALERT_2_C | Number C-C Bonds with Positive Residual Density. | 0      | Info  |

---

### Alert level G

CHEMS02\_ALERT\_1\_G Please check that you have entered the correct  
 \_publ\_requested\_category classification of your compound;  
 FI or CI or EI for inorganic; FM or CM or EM for metal-organic;  
 FO or CO or EO for organic.  
 From the CIF: \_publ\_requested\_category CHOOSE FI FM FO CI CM CO or  
 From the CIF: \_chemical\_formula\_sum:C20 H28 Co2 N12 O14

|                   |                                                  |        |        |
|-------------------|--------------------------------------------------|--------|--------|
| PLAT002_ALERT_2_G | Number of Distance or Angle Restraints on AtSite | 9      | Note   |
| PLAT004_ALERT_5_G | Polymeric Structure Found with Maximum Dimension | 1      | Info   |
| PLAT007_ALERT_5_G | Number of Unrefined Donor-H Atoms .....          | 9      | Report |
| PLAT042_ALERT_1_G | Calc. and Reported MoietyFormula Strings Differ  | Please | Check  |
| PLAT066_ALERT_1_G | Predicted and Reported Tmin&Tmax Range Identical | ?      | Check  |
| PLAT154_ALERT_1_G | The s.u.'s on the Cell Angles are Equal ..(Note) | 0.004  | Degree |
| PLAT169_ALERT_4_G | The CIF-Embedded .res File Contains AFIX 1 Recds | 9      | Report |
| PLAT172_ALERT_4_G | The CIF-Embedded .res File Contains DFIX Records | 4      | Report |
| PLAT173_ALERT_4_G | The CIF-Embedded .res File Contains DANG Records | 2      | Report |
| PLAT300_ALERT_4_G | Atom Site Occupancy of O7 Constrained at         | 0.75   | Check  |
| PLAT300_ALERT_4_G | Atom Site Occupancy of O8 Constrained at         | 0.25   | Check  |
| PLAT300_ALERT_4_G | Atom Site Occupancy of H13 Constrained at        | 0.75   | Check  |
| PLAT300_ALERT_4_G | Atom Site Occupancy of H15 Constrained at        | 0.25   | Check  |
| PLAT302_ALERT_4_G | Anion/Solvent/Minor-Residue Disorder (Resd 3 )   | 100%   | Note   |
| PLAT794_ALERT_5_G | Tentative Bond Valency for Co1 (II) .            | 1.97   | Info   |
| PLAT794_ALERT_5_G | Tentative Bond Valency for Co2 (II) .            | 2.02   | Info   |
| PLAT860_ALERT_3_G | Number of Least-Squares Restraints .....         | 6      | Note   |
| PLAT882_ALERT_1_G | No Datum for _diffrn_reflms_av_unetI/netI .....  | Please | Do !   |
| PLAT910_ALERT_3_G | Missing # of FCF Reflection(s) Below Theta(Min). | 4      | Note   |
| PLAT912_ALERT_4_G | Missing # of FCF Reflections Above STh/L= 0.600  | 5      | Note   |

---

1 **ALERT level A** = Most likely a serious problem - resolve or explain  
 4 **ALERT level B** = A potentially serious problem, consider carefully  
 30 **ALERT level C** = Check. Ensure it is not caused by an omission or oversight  
 21 **ALERT level G** = General information/check it is not something unexpected

5 ALERT type 1 CIF construction/syntax error, inconsistent or missing data  
 13 ALERT type 2 Indicator that the structure model may be wrong or deficient  
 5 ALERT type 3 Indicator that the structure quality may be low  
 29 ALERT type 4 Improvement, methodology, query or suggestion  
 4 ALERT type 5 Informative message, check

---

It is advisable to attempt to resolve as many as possible of the alerts in all categories. Often the minor alerts point to easily fixed oversights, errors and omissions in your CIF or refinement strategy, so attention to these fine details can be worthwhile. In order to resolve some of the more serious problems it may be necessary to carry out additional measurements or structure refinements. However, the purpose of your study may justify the reported deviations and the more serious of these should normally be commented upon in the discussion or experimental section of a paper or in the "special\_details" fields of the CIF. checkCIF was carefully designed to identify outliers and unusual parameters, but every test has its limitations and alerts that are not important in a particular case may appear. Conversely, the absence of alerts does not guarantee there are no aspects of the results needing attention. It is up to the individual to critically assess their own results and, if necessary, seek expert advice.

### **Publication of your CIF in IUCr journals**

A basic structural check has been run on your CIF. These basic checks will be run on all CIFs submitted for publication in IUCr journals (*Acta Crystallographica*, *Journal of Applied Crystallography*, *Journal of Synchrotron Radiation*); however, if you intend to submit to *Acta Crystallographica Section C* or *E* or *IUCrData*, you should make sure that full publication checks are run on the final version of your CIF prior to submission.

### **Publication of your CIF in other journals**

Please refer to the *Notes for Authors* of the relevant journal for any special instructions relating to CIF submission.

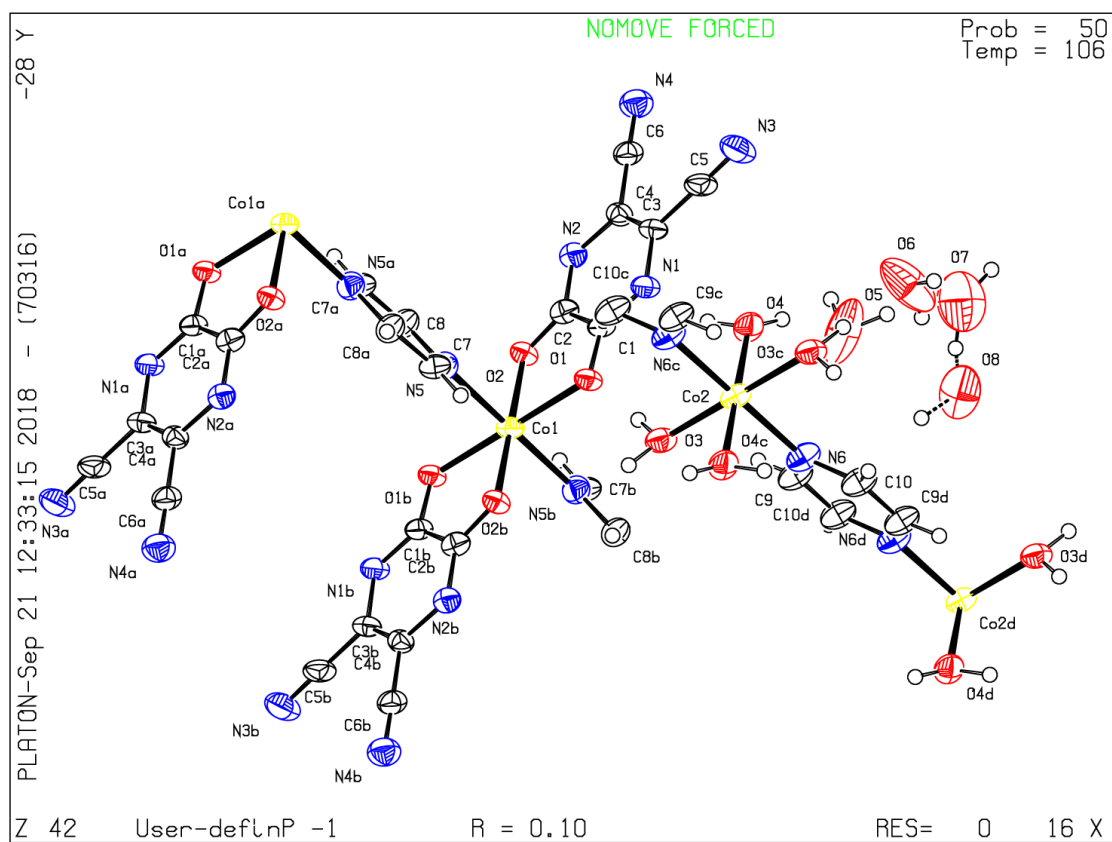

Supplement: s1 [file s1]
