# Supplementary material
Source: MDPI journal article supplement (https://www.mdpi.com/2304-6740/6/4/115)
Supplement: s1 [file s1]

# Supplementary Materials: Hydrogen-Bonding Assembly of Coordination Polymers Showing Reversible Dynamic Solid-State Structural Transformations

Hitoshi Kumagai, Sadahiro Yagishita, Ken Kanazashi, Mariko Ishii, Shinya Hayami, Hisashi Konaka, Ryuta Ishikawa and Satoshi Kawata

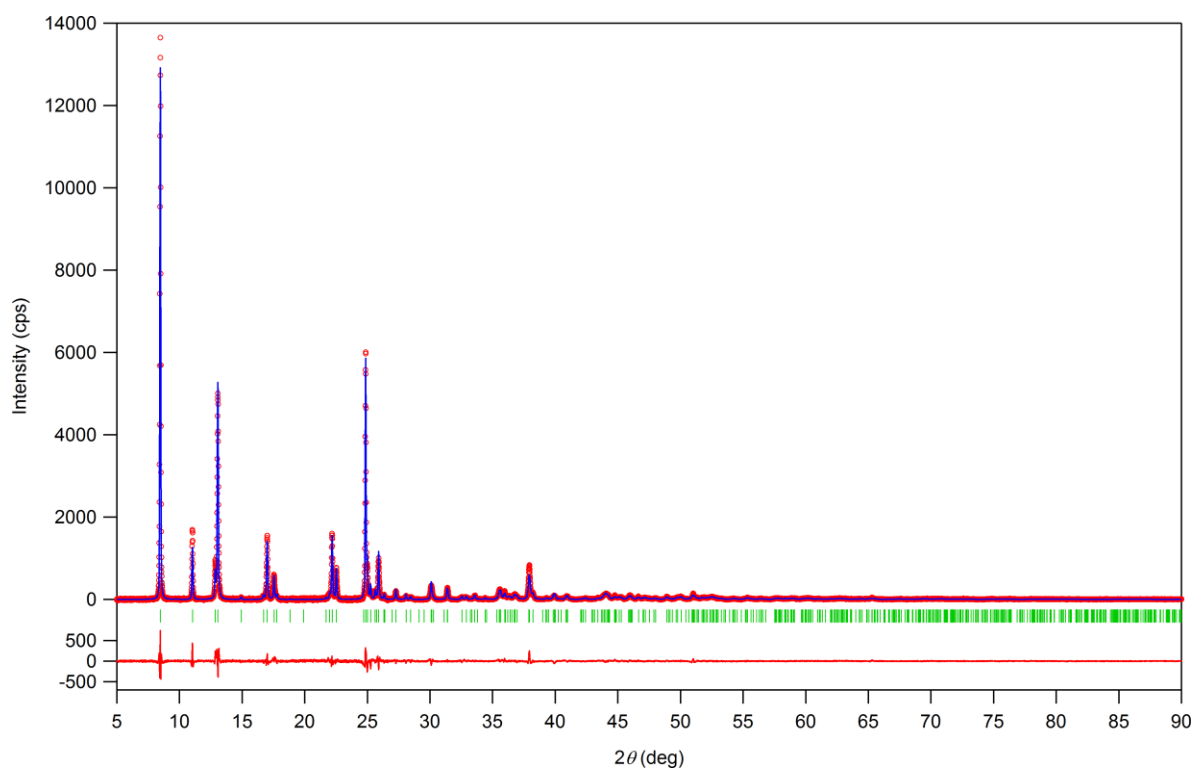

**Figure S1.** Rietveld refinement of PXRD pattern of **2·2H<sub>2</sub>O**. Red open circles, green bars, and blue and red solid lines represent the experimental pattern, the best-fitted pattern, the calculated Bragg reflection the difference between experimental and fitted patterns, respectively. The determined lattice parameters are described in the text.
